# Supplementary material for: Identification and validation of an epithelial mesenchymal transition-related gene pairs signature for prediction of overall survival in patients with skin cutaneous melanoma
Source: PeerJ journal article supplement (doi:10.7717/peerj.12646), 2022-01-21

A

Risk — High risk — Low risk

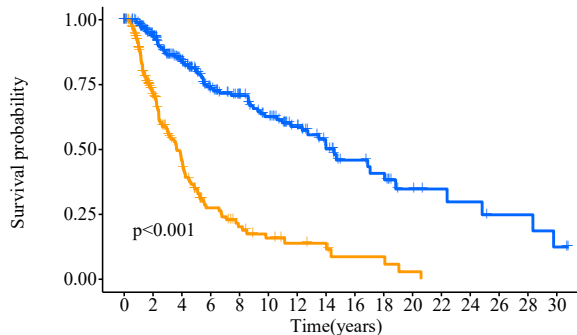

| Risk    | Highrisk | 188 | 98  | 53 | 24 | 15 | 10 | 7  | 6  | 3  | 3  | 1  | 0  | 0  | 0  | 0  | 0  |
|---------|----------|-----|-----|----|----|----|----|----|----|----|----|----|----|----|----|----|----|
| Lowrisk | 234      | 184 | 136 | 94 | 76 | 58 | 41 | 27 | 19 | 16 | 9  | 7  | 6  | 4  | 4  | 2  |    |
|         |          | 0   | 2   | 4  | 6  | 8  | 10 | 12 | 14 | 16 | 18 | 20 | 22 | 24 | 26 | 28 | 30 |

Time(years)

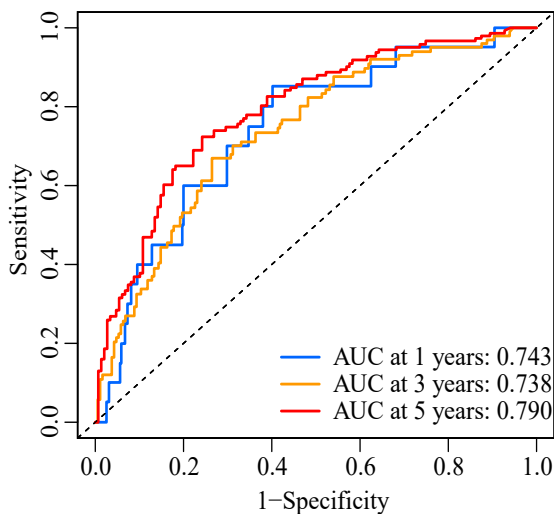

B

Risk — High risk — Low risk

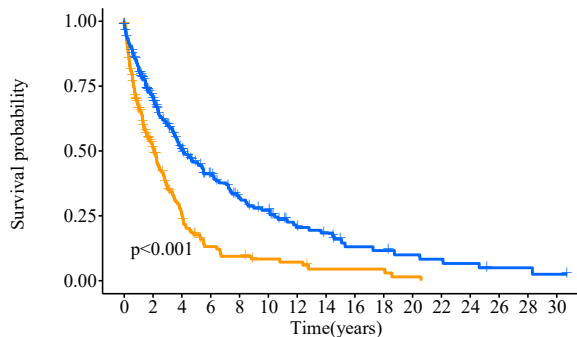

| Risk    | Highrisk | 192 | 75 | 33 | 14 | 10 | 7  | 6  | 3  | 3  | 3  | 1  | 0  | 0  | 0  | 0  |    |
|---------|----------|-----|----|----|----|----|----|----|----|----|----|----|----|----|----|----|----|
| Lowrisk | 236      | 145 | 90 | 61 | 41 | 33 | 20 | 16 | 9  | 8  | 6  | 5  | 4  | 2  | 2  | 1  |    |
|         |          | 0   | 2  | 4  | 6  | 8  | 10 | 12 | 14 | 16 | 18 | 20 | 22 | 24 | 26 | 28 | 30 |

Time(years)

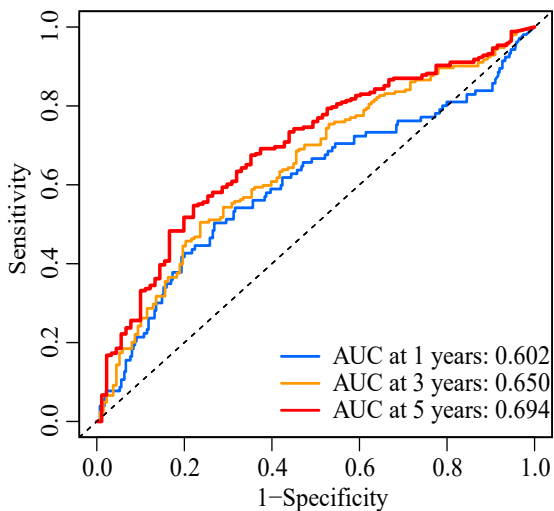

Supplement: Figure_S1.pdf [file Figure_S1.pdf]
